# Supplementary material for: Circular extrachromosomal DNA promotes tumor heterogeneity in high-risk medulloblastoma
Source: PubMed Central journal article supplement (PMC10703696; doi:10.1038/s41588-023-01551-3), 2023-11-09

Ladders

amp1

amp2

3.13Mb

2.7Mb

2.35Mb

1.7Mb

1.4Mb

1Mb

1A

1B

1C

1D

1E

1F

1G

2A

2B

2C

2D

2E

2F

2G

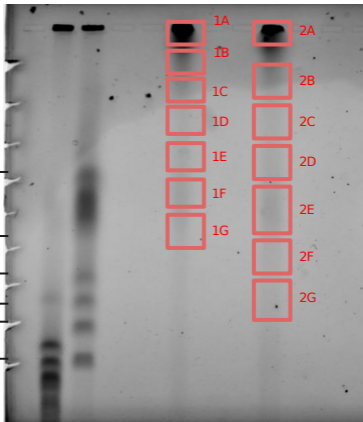

Supplement: 41588_2023_1551_MOESM5_ESM.pdf [file 41588_2023_1551_MOESM5_ESM.pdf]
